# Supplementary material
Source: publisher figshare collection journal article supplement (https://frontiersin.figshare.com/ndownloader/files/27681819)
Supplement: Supplementary file 1 [file 27681819]

## Sheet: freshwater
Simulated period: 31-10-2018 -> 24-10-2018 during a Po of Goro flood
Average fluxes [m3s-1]during the simulated period for each layer of the model
Model configurations:
LO-MO: Gorino lock and Manufatto gate OPEN
LC-MC: Gorino lock and Manufatto gate CLOSED
		west. channel					centr.	east. channel					Gorino		manufatto
		layer1	layer2	layer3	layer4	layer5	layer1	layer1	layer2	layer3	layer4	layer5	layer1	layer2	layer1	layer2	layer3
	LO-MO	-18.4379	1.48339	13.6769	9.25594	2.18049	-75.6792	-35.7841	2.06505	7.92466	6.33788	2.14936	17.1284	7.39073	20.0187	16.2473	7.80687
	LC-MC	-11.2804	3.4458	11.085	8.28814	2.03721	-37.0002	-24.4349	2.02838	6.41122	5.48448	2.0467	-	-	8.8007	8.28998	2.95028

## Sheet: tidal forcing
Simulated period: 06-05-2018 -> 06-06-2018 with moderate fershwater inputs
Average fluxes [m3s-1]during the simulated period for each layer of the model
Model configuration: LO-MO, Gorino lock and Manufatto gate OPEN
		west. channel					centr.	east. channel					Gorino		manufatto
		layer1	layer2	layer3	layer4	layer5	layer1	layer1	layer2	layer3	layer4	layer5	layer1	layer2	layer1	layer2	layer3
	NO TIDE	-26.6243	14.6594	26.7051	5.95781	0.680478	-92.8663	-29.6	10.139	7.41175	2.84249	0.667993	10.7383	4.94249	14.2856	11.7768	5.37765
	TIDE	-22.8642	-0.00638611	13.0405	7.73161	1.70085	-57.5251	-22.849	-0.462535	4.70479	4.85423	1.99045	10.6745	4.79356	10.5247	8.66203	3.84835

## Sheet: monthly_fluxes
Simulated period: 01-01-2018 -> 31-12-2018
Average fluxes [m3s-1]during the simulated period for each layer of the model
Model configurations (Po of Goro configurations) according to the Figure 2
	western channel					centr.	east. channel					Gorino		manufatto
	lay_1	lay_2	lay_3	lay_4	lay_5	lay_1	layer1	layer2	layer3	layer4	layer5	layer1	layer2	layer1	layer2	layer3
jan	-10.01	0.92	7.67	5.88	1.66	-10.7615	-10.09	-1.51	0.93	2.97	1.42	4.09575	-0.80637	0.582645	0.217868	0.699832
feb	-14.23	9.96	18.91	13.5	3.17	-65.3057	-29.24	1.24	6.89	7.22	2.6	6.19851	0.582713	3.94075	3.45922	1.57037
mar	-19.26	3.93	16.85	10.08	2.28	-51.4182	-22.89	-0.09	3.99	5.44	2.3	3.36884	0.00577419	4.11674	3.50804	1.28951
apr	-16.92	-1.42	9.06	6.42	1.78	-34.7222	-17.53	-1.28	2.85	4.76	2.17	5.56017	1.1305	7.21043	5.61143	1.62092
may	-20.37	1.79	13.1	8.13	1.82	-50.2314	-23.15	0.67	5.23	5.01	2.03	1.56124	0.576887	11.0683	8.88839	3.82779
jun	-18.8	1.28	12.81	8.67	2.08	-47.7318	-23.19	0.46	5.5	5.67	2.46	3.15617	0.875254	9.92516	8.17362	3.3017
jul	-17.37	3.35	12.13	7.95	1.99	-37.2621	-18.42	-0.47	3.49	5.35	2.24	3.72512	-0.342218	3.21376	2.61295	0.539718
aug	-17.76	5.9	14.89	9.25	2.18	-39.867	-19.13	-0.35	3.61	5.15	2.05	3.48118	-0.254181	3.88061	2.88788	0.777344
sep	-17.33	4.37	14.14	9.3	2.21	-42.4255	-20.85	-0.73	3.63	5.9	2.48	4.63277	-0.0492167	6.0374	4.55326	1.49937
oct	-14.18	1.32	9.02	6.76	1.79	-28.7791	-16.86	0.52	4.08	5.47	2.25	4.25362	-0.365696	6.34404	4.81014	1.51813
nov	-12.37	4.18	12.18	8.82	2.16	-42.1706	-25.45	1.56	6.23	5.37	2.07	2.14487	0.618035	7.8855	7.48049	2.66469
dec	-11.85	1.46	10.37	7.71	2.12	-22.3799	-12.68	-2.57	1.56	3.6	1.65	4.88156	-0.0950423	1.28005	1.01544	0.826703
